# Supplementary material for: Microbiota Dynamics of Mechanically Separated Organic Fraction of Municipal Solid Waste during Composting
Source: MDPI journal article supplement (doi:10.3390/microorganisms9091877), 2021-09-03
Supplement: s1 [file s1]

**Table S1.** Morphological composition of ms-OFMSW (fraction <70 mm) and the heat capacity of its components

| No     | Components                           | Content*, % (m/m) | Heat capacity<br>kJ kg <sup>-1</sup> °C <sup>-1</sup> [19] | Weighted average<br>heat capacity,<br>kJ kg <sup>-1</sup> °C <sup>-1</sup> |
|--------|--------------------------------------|-------------------|------------------------------------------------------------|----------------------------------------------------------------------------|
| 1.     | Food waste                           | 55.87 ± 2.43      | 1.99                                                       | 1.11                                                                       |
| 2.     | Waste paper                          | 8.56 ± 0.37       | 1.40                                                       | 0.12                                                                       |
| 3.     | Plastic                              | 8.27 ± 0.79       | 1.73                                                       | 0.14                                                                       |
| 4.     | Stone, sand, ceramics                | 7.77 ± 0.21       | 1.03                                                       | 0.08                                                                       |
| 5.     | Combined materials (Tetra Pak, etc.) | 6.85 ± 0.31       | 1.36                                                       | 0.09                                                                       |
| 6.     | Glass                                | 6.16 ± 0.24       | 0.66                                                       | 0.04                                                                       |
| 7.     | Wood                                 | 4.48 ± 0.22       | 1.61                                                       | 0.07                                                                       |
| 8.     | Metal                                | 0.69 ± 0.03       | 0.93                                                       | 0.01                                                                       |
| 9.     | Textile                              | 0.56 ± 0.02       | 1.29                                                       | 0.01                                                                       |
| 10.    | Other (fraction less than 15 mm)     | 0.79 ± 0.03       | 1.33                                                       | 0.01                                                                       |
| Total: |                                      | 100.00            |                                                            | 1.68                                                                       |

\* - average value ± standard deviation of three replicates

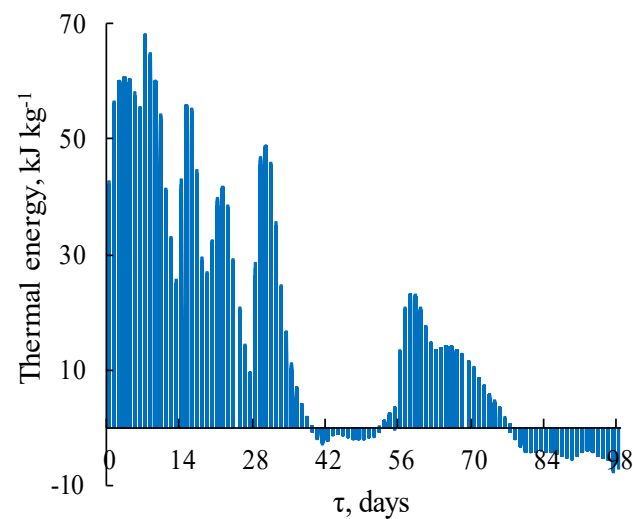

**Figure S1.** Heat release during composting

**Table S2.** Pearson correlations between microbiological and environmental variables:  $r_{crit}$  ( $f=4$ ,  $\alpha=0.05$ ) = 0.81 (Strode, Brokaw, 2015)

|                               | CO <sub>2</sub> , g<br>kg <sup>-1</sup><br>day <sup>-1</sup> | T, °C | NH <sub>3</sub> , mg<br>kg <sup>-1</sup> day <sup>-1</sup> | EC,<br>μS<br>cm <sup>-1</sup> | pH    | OM, % | C, %  | N, %  | C/N   | GI, % | NI    | Water<br>content, % | Heat release, kJ<br>kg <sup>-1</sup> |
|-------------------------------|--------------------------------------------------------------|-------|------------------------------------------------------------|-------------------------------|-------|-------|-------|-------|-------|-------|-------|---------------------|--------------------------------------|
| <i>Bacillus</i>               | 0.73                                                         | 0.70  | 0.92                                                       | -0.37                         | 0.67  | -0.24 | -0.24 | -0.54 | -0.32 | 0.06  | -0.13 | -0.89               | 0.87                                 |
| <i>uncultured Bacillaceae</i> | -0.21                                                        | 0.64  | 0.11                                                       | -0.80                         | 0.04  | 0.97  | 0.97  | -0.20 | 0.82  | -0.79 | -0.47 | -0.46               | 0.38                                 |
| <i>Ureibacillus</i>           | -0.30                                                        | -0.91 | 0.98                                                       | -0.22                         | 1.00  | n.d.  | n.d.  | n.d.  | n.d.  | -0.64 | -0.26 | 0.67                | 0.71                                 |
| <i>Aeribacillus</i>           | 0.95                                                         | -0.96 | 0.81                                                       | 0.85                          | 0.92  | n.d.  | n.d.  | n.d.  | n.d.  | 0.75  | -0.56 | 0.01                | 0.98                                 |
| <i>Novibacillus</i>           | -0.19                                                        | 0.56  | 0.04                                                       | -0.50                         | 0.01  | 0.76  | 0.76  | -0.67 | 1.00  | -0.59 | 0.11  | -0.55               | -0.17                                |
| <i>Streptomyces</i>           | 0.42                                                         | 0.23  | -0.54                                                      | 0.11                          | -0.62 | 0.47  | 0.47  | 0.95  | -0.91 | 0.33  | -0.12 | 0.07                | -0.18                                |
| <i>Tepidimicrobium</i>        | 0.96                                                         | 0.47  | 0.79                                                       | -0.26                         | 0.45  | 0.09  | 0.09  | n.d.  | n.d.  | 0.09  | 0.09  | -0.74               | 0.93                                 |
| <i>Thermobifida</i>           | 0.28                                                         | 0.62  | 0.11                                                       | -0.69                         | 0.15  | 0.92  | 0.92  | -0.72 | 1.00  | -0.79 | 0.02  | -0.80               | 0.23                                 |
| <i>Geobacillus</i>            | -0.47                                                        | -0.82 | 1.00                                                       | -0.40                         | 0.99  | n.d.  | n.d.  | n.d.  | n.d.  | -0.77 | -0.07 | 0.52                | 0.56                                 |
| <i>Paenibacillus</i>          | -0.94                                                        | 0.84  | 0.41                                                       | -0.59                         | -0.85 | 0.28  | 0.28  | 0.75  | -0.09 | -0.22 | -1.00 | 0.23                | -0.29                                |
| <i>Planifilum</i>             | 0.37                                                         | 0.24  | 0.96                                                       | -0.52                         | 0.41  | 0.62  | 0.62  | -1.00 | 0.78  | -0.62 | -0.09 | -0.69               | 0.78                                 |
| <i>Saccharomonospora</i>      | -0.77                                                        | -0.27 | -0.64                                                      | 0.19                          | 0.35  | -0.10 | -0.11 | -0.79 | 1.00  | -0.05 | 0.45  | 0.29                | -0.71                                |
| <i>Oceanobacillus</i>         | -0.20                                                        | -0.28 | -0.46                                                      | -0.04                         | 0.74  | 0.33  | 0.33  | -0.87 | 0.97  | -0.31 | 0.39  | -0.08               | -0.14                                |
| <i>Vulgatibacter</i>          | -0.90                                                        | -0.83 | -0.58                                                      | 0.85                          | 0.43  | -0.98 | -0.98 | n.d.  | n.d.  | 0.67  | 0.50  | 0.78                | -0.96                                |
| SO134                         | -0.59                                                        | -0.84 | -0.72                                                      | 0.62                          | 0.76  | -0.54 | -0.54 | -0.88 | 0.33  | 0.33  | 0.69  | 0.52                | -0.70                                |
| <i>Thermomyces</i>            | 0.31                                                         | 0.21  | -0.37                                                      | 0.31                          | 0.53  | -0.48 | -0.48 | -0.70 | -0.30 | 0.50  | 0.31  | -0.28               | -0.09                                |
| <i>Penicillium</i>            | 0.15                                                         | -0.10 | 0.75                                                       | -0.27                         | -0.04 | 0.82  | 0.82  | 0.92  | 0.78  | -0.28 | -0.37 | -0.02               | 0.69                                 |
| <i>Microascus</i>             | -0.17                                                        | 0.41  | 0.29                                                       | -0.08                         | 0.15  | -0.70 | -0.70 | 0.64  | -0.91 | 0.08  | 0.02  | -0.26               | -0.13                                |
| <i>Aspergillus</i>            | 0.37                                                         | -0.05 | 0.76                                                       | -0.17                         | 0.23  | 0.06  | 0.06  | -0.44 | 0.23  | -0.11 | -0.15 | -0.25               | 0.77                                 |
| Chao1 prokaryotes             | -0.06                                                        | -0.11 | -0.25                                                      | 0.79                          | 0.24  | -0.81 | -0.81 | 0.36  | -0.96 | 0.88  | 0.20  | 0.23                | -0.37                                |
| Shannon prokaryotes           | -0.53                                                        | -0.41 | -0.72                                                      | 0.78                          | -0.06 | -0.77 | -0.77 | 0.50  | -0.96 | 0.67  | 0.16  | 0.64                | -0.79                                |
| Chao1 fungi                   | 0.27                                                         | -0.10 | 0.72                                                       | -0.36                         | -0.21 | 0.66  | 0.66  | 0.55  | 0.39  | -0.39 | -0.34 | -0.05               | 0.68                                 |
| Shannon fungi                 | -0.01                                                        | -0.28 | 0.58                                                       | -0.21                         | -0.27 | 0.39  | 0.39  | 0.70  | 0.21  | -0.34 | -0.32 | 0.17                | 0.46                                 |

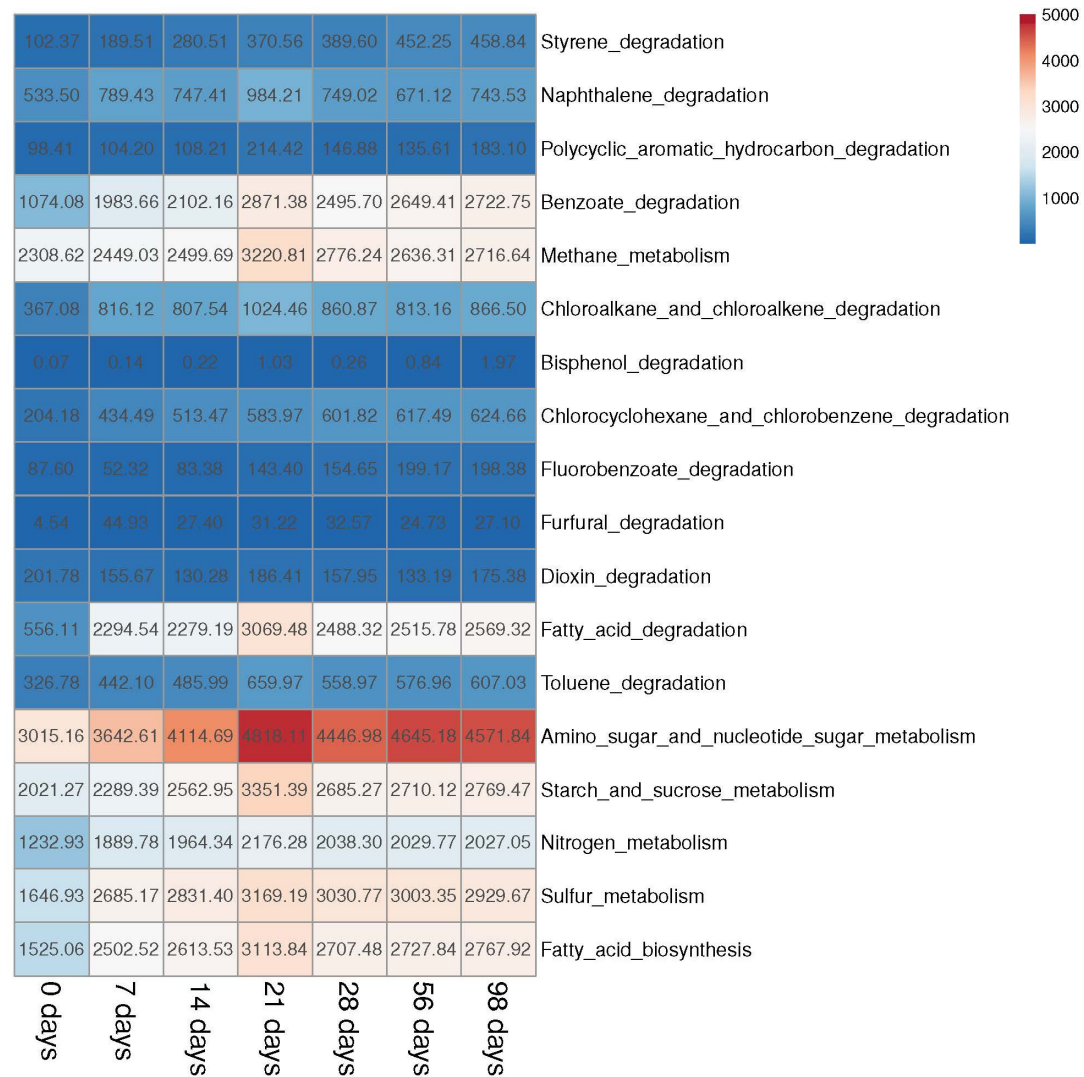

**Figure S2.** The heat map of prokaryotic microbiota functional profiles on day 0, 7, 14, 21, 28, 56, and 98 of composting. The number of genes related to particular metabolic pathway is shown by color.

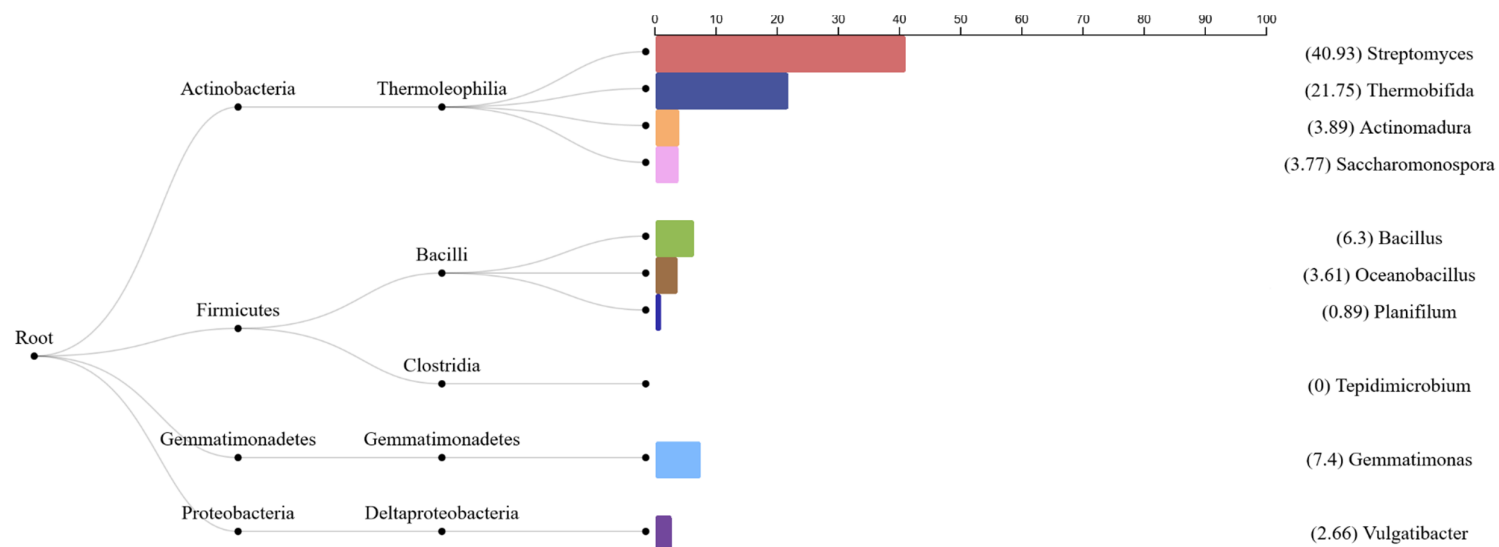

(a)

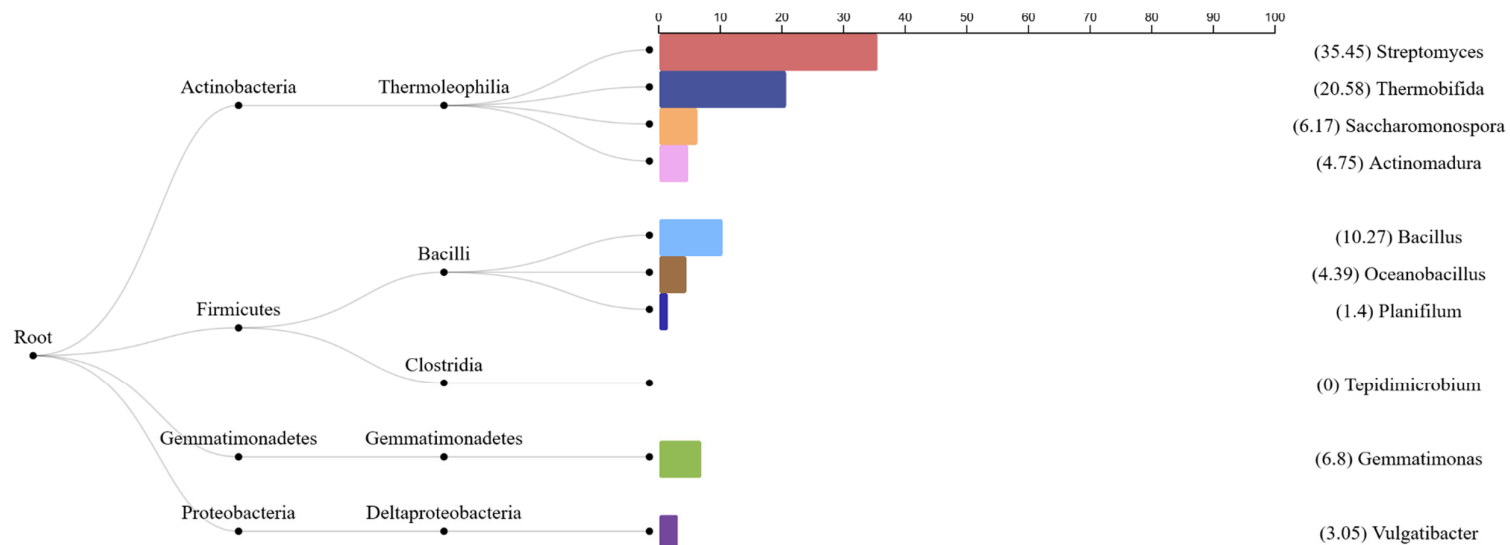

(b)

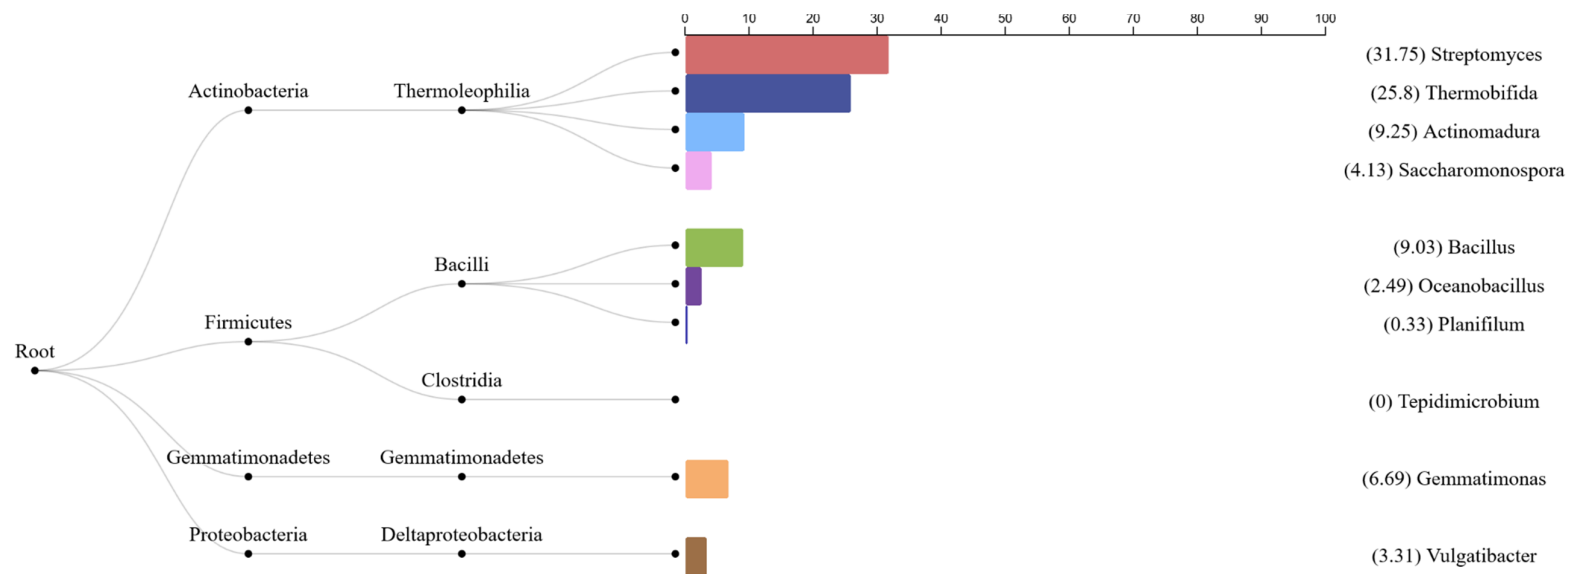

(c)

**Figure S3.** Dendrograms showing key microorganisms and their phylogenetic lines involved in metabolism of: (a) starch and sucrose, (b) methane, (c) fatty acid degradation.
